# Temporal Variability and Social Heterogeneity in Disease Transmission: The Case of SARS in Hong Kong

Anne Cori<sup>1,2\*</sup>, Pierre-Yves Boëlle<sup>1,2</sup>, Guy Thomas<sup>1,2</sup>, Gabriel M. Leung<sup>3</sup>, Alain-Jacques Valleron<sup>1,2</sup>

1 INSERM, Paris, France, 2 Université Pierre et Marie Curie-Paris6, Paris, France, 3 School of Public Health, Li Ka Shing Faculty of Medicine, The University of Hong Kong, Hong Kong, Special Administrative Region, People's Republic of China

## Abstract

The extent to which self-adopted or intervention-related changes in behaviors affect the course of epidemics remains a key issue for outbreak control. This study attempted to quantify the effect of such changes on the risk of infection in different settings, i.e., the community and hospitals. The 2002–2003 severe acute respiratory syndrome (SARS) outbreak in Hong Kong, where 27% of cases were healthcare workers, was used as an example. A stochastic compartmental SEIR (susceptible-exposed-infectious-removed) model was used: the population was split into healthcare workers, hospitalized people and general population. Super spreading events (SSEs) were taken into account in the model. The temporal evolutions of the daily effective contact rates in the community and hospitals were modeled with smooth functions. Data augmentation techniques and Markov chain Monte Carlo (MCMC) methods were applied to estimate SARS epidemiological parameters. In particular, estimates of daily reproduction numbers were provided for each subpopulation. The average duration of the SARS infectious period was estimated to be 9.3 days ( $\pm 0.3$  days). The model was able to disentangle the impact of the two SSEs from background transmission rates. The effective contact rates, which were estimated on a daily basis, decreased with time, reaching zero inside hospitals. This observation suggests that public health measures and possible changes in individual behaviors effectively reduced transmission, especially in hospitals. The temporal patterns of reproduction numbers were similar for healthcare workers and the general population, indicating that on average, an infectious healthcare worker did not infect more people than any other infectious person. We provide a general method to estimate time dependence of parameters in structured epidemic models, which enables investigation of the impact of control measures and behavioral changes in different settings.

**Citation:** Cori A, Boëlle P-Y, Thomas G, Leung GM, Valleron A-J (2009) Temporal Variability and Social Heterogeneity in Disease Transmission: The Case of SARS in Hong Kong. *PLoS Comput Biol* 5(8): e1000471. doi:10.1371/journal.pcbi.1000471

**Editor:** Neil M. Ferguson, Imperial College London, United Kingdom

**Received:** October 13, 2008; **Accepted:** July 15, 2009; **Published:** August 21, 2009

**Copyright:** © 2009 Cori et al. This is an open-access article distributed under the terms of the Creative Commons Attribution License, which permits unrestricted use, distribution, and reproduction in any medium, provided the original author and source are credited.

**Funding:** The authors thank the following for research funding: The Research Fund for the Control of Infectious Diseases of the Food and Health Bureau of the Hong Kong SAR Government (GML); The University of Hong Kong SARS Research Fund (GML); The EU Sixth Framework Programme for Research for Policy Support (contracts SP22-CT-2004-511066 and FP6-2003-SSP2-513715) (AC, P-YB, GT, GML, A-JV). The funders had no role in study design, data collection and analysis, decision to publish, or preparation of the manuscript.

**Competing Interests:** The authors have declared that no competing interests exist.

\* E-mail: cori@u707.jussieu.fr

## Introduction

Emerging infectious diseases have been defined as, “infections that have newly appeared in a population or have existed previously but are rapidly increasing in incidence or geographic range. [1]” Several features may make them particularly threatening. First, recognizing the disease can be difficult when the first cases appear, especially when the symptoms are non-specific. Second, no vaccine or specific treatment may be known initially. Moreover, heterogeneities in disease transmission may create high-risk groups, such as healthcare workers [2–5] and high-risk geographical areas, thereby dramatically enhancing the impact of the outbreak [6].

The 2003 severe acute respiratory syndrome (SARS) outbreak in Hong Kong is remarkably illustrative of the above issues: symptoms were similar to pneumonia [7]; the incubation period was long enough for local and international transmission to occur [8]; no vaccine or treatment was available; as much as 21% of cases worldwide were healthcare workers [9]. The outbreak also demonstrated the possible existence of super-spreading events (SSEs) [10], during which a few infectious individuals contaminated

a high number of secondary cases. Hong Kong had two SSEs: the first occurred in Hospital X around March 3 and led to about 125 cases [11]; the second occurred in Housing Estate Y on March 19, and led to over 300 cases [12,13]. Despite its particularly threatening features, the outbreak was brought under control.

In this context, once the epidemic is detected, spontaneous changes in behavior will occur, and non-pharmacological measures are usually initiated to control the outbreak. The resulting effects of these two phenomena on disease transmission is not easily quantified.

The effective contact rate, which reflects the combined influences of social proximity (the number of contacts per time unit) and the probability of infection through each contact, is an essential determinant of disease spread. Our aim was to estimate the temporal variation of this parameter in the community and hospitals, over the course of the outbreak.

Previously published mathematical models of parameter estimation addressed the issues of temporal variability [12,14] or social heterogeneity [2,15]. Here we present an approach that deals with both issues, together with the occurrence of SSEs. Then the method is applied to the 2003 SARS epidemic in Hong Kong (SARSID database [13]).

## Author Summary

Recent epidemics have shown that healthcare workers may be overrepresented among cases and how critical it is to protect them. For example, during the 2002–2003 severe acute respiratory syndrome (SARS) epidemics in Hong Kong, 27% of cases were healthcare workers when they were <1% of the population. Better means of protection require understanding how healthcare workers were infected and assessing their role in disease transmission. Here, we describe a method for estimating the temporal profile of the risk of infection and probability of transmission in the community and hospitals. The 2002–2003 SARS outbreak in Hong Kong is used as an example. For the SARS epidemic, we show that the risk of infection in the community and hospitals decreased with time down to zero in hospitals but remained larger in the community. This observation suggests that public health measures and behavioural changes most effectively reduced transmission in hospitals. Besides, we find that the large number of cases observed among healthcare workers is more likely a result of large and sustained exposure to hospitalized cases than to transmission among healthcare workers. These results are of interest to design control measures in the event of an influenza pandemic.

## Materials and Methods

### Data

Among the 1755 patients admitted to Hong Kong hospitals in 2003 for suspected SARS, 1467 serologically confirmed SARS cases were retained for analysis. For each case, occupation, date of symptom onset, date of hospital admission, duration of hospital stay and discharge status (dead or alive) were recorded. Durations of hospital stay were missing for 12 cases and imputed to 100 days.

### Transmission Model

The epidemic process was cast into a discrete time stochastic susceptible-exposed-infectious-removed (SEIR) compartmental model, designed to reflect a two-way classification of individuals according to disease status and ‘social’ category (Figure 1).

The latter was defined in three categories: hospitalized patients (hp), healthcare workers (hw), and the general population (gp).

According to these three social categories, SARS cases were qualified: nosocomial when the patient had been hospitalized for  $\geq 5$  days before symptom onset ( $n = 72$ ); healthcare workers when the subjects were indeed healthcare workers and not nosocomial ( $n = 394$ ); or general population, all others ( $n = 1001$ ). Their corresponding epidemic curves are shown in Figure 2.

Disease status was described in five compartments: susceptible (S), exposed (E), infectious non-hospitalized (I), infectious hospitalized (H), and removed (R). Individuals are initially susceptible to the disease and infected through contact with infectious subjects. Once infected, individuals are first exposed (infected, non-infectious) and then become infectious. The infectious stage is defined as the period of time during which infectious individuals can transmit the disease through contact with susceptibles. Finally, the infectious individuals are removed, either through recovery or death. Quarantine or isolation was not documented in the database, and was not specifically described: possibly isolated infectious individuals remain in stage *I* or *H*, and quarantined contacts remain in stage *S*.

Thus, depending on social category, susceptible individuals may be in compartments  $S^{gp}$  (general population),  $S^{hw}$  (healthcare workers), or  $S^{hp}$  (hospitalized patients); similarly, exposed and recovered individuals may be in compartments  $E^{gp}$ ,  $E^{hw}$  or  $E^{hp}$ , and  $R^{gp}$ ,  $R^{hw}$  or  $R^{hp}$ , respectively; while infectious subjects are in compartments  $I^{gp}$  or  $I^{hw}$  before hospitalization, and in compartments  $H^{gp}$ ,  $H^{hw}$  or  $H^{hp}$  once hospitalized.

The size of the Hong Kong population ( $N = 7000000$ ) was obtained from local census data (<http://www.info.gov.hk/info/hkbrief/eng/living2.htm>). The number of hospitalized patients ( $N^{hp} = 34000$ ) equaled the number of hospital beds in Hong Kong (<http://www.info.gov.hk/info/hkbrief/eng/living2.htm>). The number of healthcare workers ( $N^{hw} = 59000$ ) was derived from the healthcare worker-to-bed ratio in the Hospital X [13].  $N^{gp}$ ,  $N^{hw}$  and  $N^{hp}$  were assumed to be constant throughout the epidemic. Under this steady-state assumption, transitions between compartments  $S^{gp}$ ,  $S^{hw}$ , and  $S^{hp}$  did not have to be included explicitly in the model.

The model assumes that there is no direct contact between hospitalized individuals and non hospitalized individuals from the

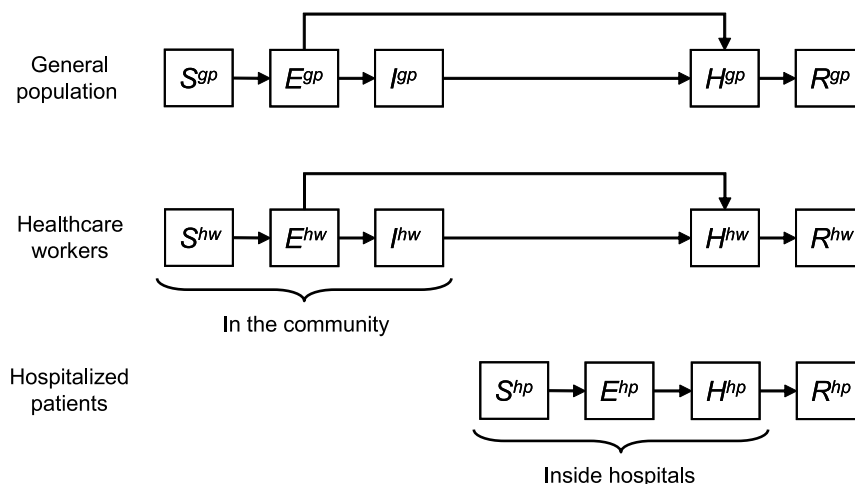

**Figure 1. Compartmental Model for SARS Transmission in Hong Kong.** Superscript letters denote social categories: *gp*, general population; *hw*, healthcare workers; *hp*, hospitalized patients. Disease states are: *S*, susceptible; *E*, exposed (infected but not yet infectious); *I*, infectious not hospitalized; *H*, infectious hospitalized, and *R*, removed (recovered or dead).  
doi:10.1371/journal.pcbi.1000471.g001

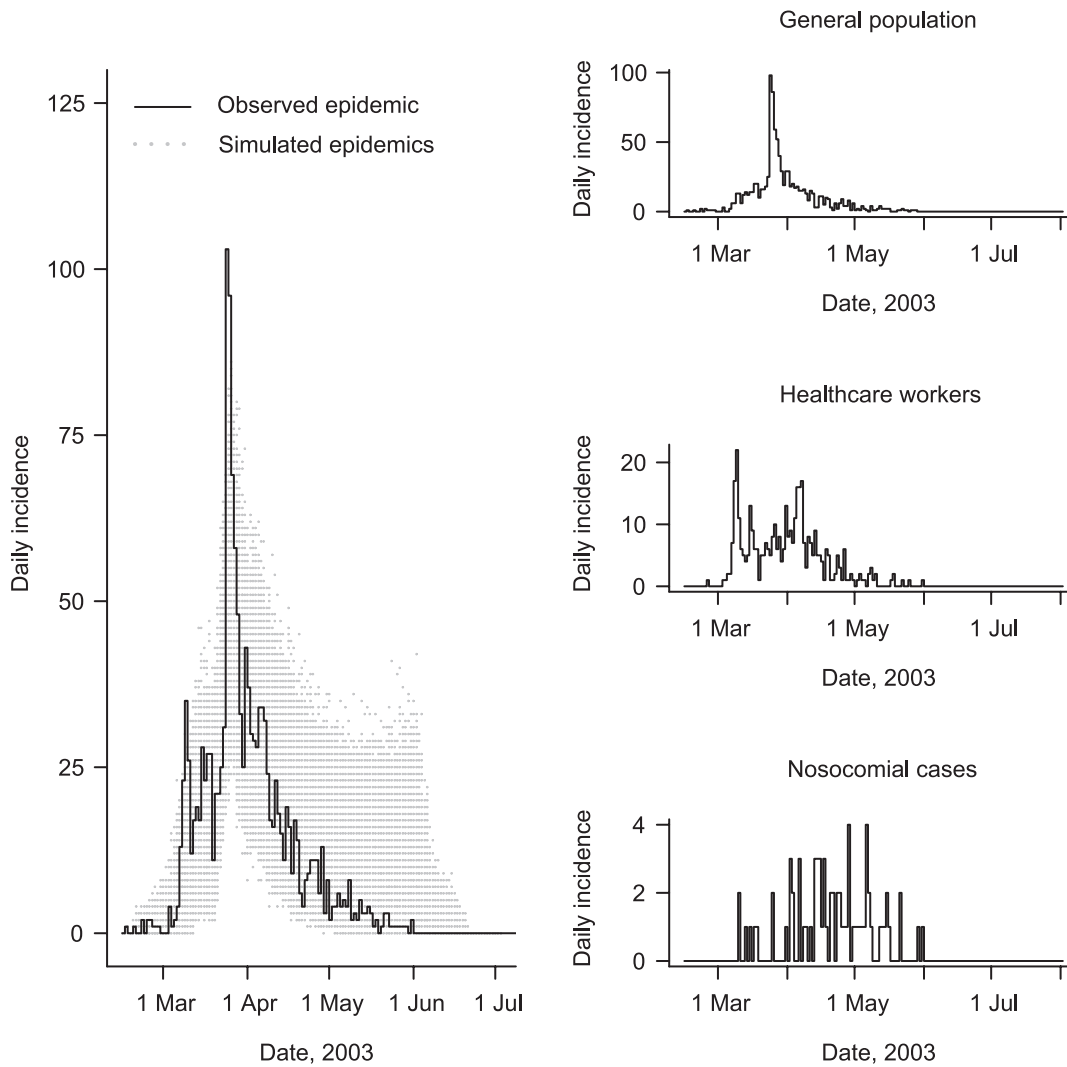

**Figure 2. Daily Incidence of SARS Symptom Onset (Observed and  $5 \times 10^4$  Simulated Epidemics), Hong Kong, 2003.** Cases were defined as: nosocomial when patients had been hospitalized for  $\geq 5$  days before symptom onset ( $n = 72$ ); healthcare workers when they were indeed healthcare workers and not nosocomial ( $n = 394$ ); and general population, otherwise ( $n = 1001$ ). The grey cloud surrounding the observed epidemic curve corresponds to simulated epidemic curves.  
doi:10.1371/journal.pcbi.1000471.g002

general population. In particular, susceptible individuals in the general population ( $S^{gp}$  compartment) cannot be infected by infectious hospitalized SARS cases ( $H^{gp}$ ,  $H^{hw}$ , and  $H^{hp}$  compartments), and susceptible hospitalized patients ( $S^{hp}$  compartment) cannot be infected by infectious not-yet-hospitalized cases from the general population ( $I^{gp}$  compartment).

### Statistical Model

In the following,  $\mathbf{1}_{\{X\}}$  denotes the indicator function, defined by  $\mathbf{1}_{\{X\}} = 1$  if  $X$  is true, and 0 otherwise.

For each Hong Kong inhabitant  $i$  ( $i = 1, \dots, N$ ), let  $O_i$  be the time of symptom onset,  $A_i$  the day of hospital admission,  $D_i$  the day of hospital discharge,  $V_i$  the day of death ( $V_i = +\infty$  if the case did not die from SARS), and  $P_i$  the social category ( $P_i = hp$  if  $A_i + 5 \leq O_i$ ,  $P_i = hw$  if  $A_i + 5 > O_i$  and inhabitant  $i$  is a healthcare worker, and  $P_i = gp$  otherwise). For all inhabitants who were not infected by SARS, we let  $O_i = A_i = D_i = V_i = +\infty$ .

For each individual  $i$  ( $i = 1, \dots, N$ ), let  $Y_i = (O_i, A_i, D_i, V_i, P_i)$ . The observed data  $Y_i$  were augmented with  $\Omega_i = (\omega_i, v_i, \alpha_i, \psi_i, \delta_i, \kappa_i)$ ,

where  $\omega_i$ ,  $v_i$ ,  $\alpha_i$  and  $\psi_i$  correspond to the dates of transition into the  $E$ ,  $I$ ,  $H$  and  $R$  states respectively;  $\delta_i$  is the date of death, and  $\kappa_i$  is the social category for case  $i$  ( $\kappa_i = gp, hw$  or  $hp$ ).

Letting  $\mathbf{Y} = \{Y_i, i = 1, \dots, N\}$  and  $\mathbf{\Omega} = \{\Omega_i, i = 1, \dots, N\}$ , the joint density  $\zeta$  of  $\mathbf{Y}$ ,  $\mathbf{\Omega}$ , and of the vector  $\boldsymbol{\theta}$  of unknown parameters is written as the following product:

$$\zeta(\mathbf{Y}, \mathbf{\Omega}, \boldsymbol{\theta}) = P(\mathbf{Y}|\mathbf{\Omega})P(\mathbf{\Omega}|\boldsymbol{\theta})P(\boldsymbol{\theta})$$

where  $P(\mathbf{Y}|\mathbf{\Omega}) = \prod_{i=1}^N P(Y_i|\Omega_i)$ , and  $P(\boldsymbol{\theta})$  is a prior distribution for  $\boldsymbol{\theta}$ .

As defined by Auranen et al. [17],  $P(\mathbf{Y}|\mathbf{\Omega})$ ,  $P(\mathbf{\Omega}|\boldsymbol{\theta})$  and  $P(\boldsymbol{\theta})$  refer to the observation level, the transmission level and the prior level respectively.

The observation level ensures that the observed data are consistent with the augmented data.

During the SARS outbreak, few cases were reportedly infected by asymptomatic persons, but cases rapidly became infectious after

symptom onset [12,18,19]. Therefore, for each case  $i$ , the onset of symptom was considered acceptable if  $v_i - 4 \leq O_i \leq v_i + 1$ .

The day  $A_i$  of hospital admission was consistent with the augmented data if  $A_i = \alpha_i$  when the case was infectious prior to hospitalization ( $v_i < \alpha_i < \psi_i$ )  $A_i \leq v_i$  when the case was infectious only after hospitalization ( $\alpha_i = v_i$ )  $A_i \geq \psi_i$  when the case was not infectious anymore at the time of hospitalization ( $\alpha_i = \psi_i$ ).

It was also assumed that the infectious period did not outlast hospital discharge, that is  $D_i \geq \psi_i$

The date of death was  $V_i = \delta_i$ .

Finally, the professional category  $P_i$  was acceptable if  $P_i = \kappa_i$ .

Hence:

$$P(\mathbf{Y}|\mathbf{Z},\mathbf{\Omega}) = \prod_{i,v_i < +\infty} \mathbf{1}_{\{O_i - 1 \leq v_i \leq \psi_i + 4\}} \mathbf{1}_{\{D_i \geq \psi_i\}} \mathbf{1}_{\{V_i = \delta_i\}} \mathbf{1}_{\{P_i = \kappa_i\}} \\ \times \prod_{i,v_i < \alpha_i < \psi_i} \mathbf{1}_{\{A_i = \alpha_i\}} \times \prod_{i,\alpha_i = v_i < +\infty} \mathbf{1}_{\{A_i \leq v_i\}} \times \prod_{i,\alpha_i = \psi_i < +\infty} \mathbf{1}_{\{A_i \geq \psi_i\}}$$

The transmission level describes SARS transmission, assuming  $\mathbf{Z}$  and  $\mathbf{\Omega}$  are known, conditional on the day  $\omega_i$  of infection of the first case.

A deterministic latent period of 5 days was assumed for all cases ( $\omega_i = v_i - 5$  for  $i$  such that  $O_i < +\infty$ ) [13].

The duration of the infectious period ( $\psi_i - v_i$ ) for SARS cases was gamma-distributed, with mean  $m$  and variance  $q^2$ . We let  $f_{m,q^2}$  and  $F_{m,q^2}$  denote its density and cumulative distribution function respectively. For SARS patients dead on discharge, the infectious period was considered censored by death. Since the infectious period was defined as the period during which infectious cases can transmit the disease through contact with susceptibles, its distribution was assumed to remain the same over the course of the epidemic.

The specific stochastic infection rates on day  $t$  for susceptible individuals in compartments  $S^{sp}$ ,  $S^{hw}$ , and  $S^{hp}$  are:  $\lambda_t^{sp} = \beta_t \frac{I_t^{sp} + I_t^{hw}}{N^{sp} + N^{hw}} + \zeta^Y \mathbf{1}_{\{\tau_0^Y \leq t \leq \tau_1^Y\}}$ ,  $\lambda_t^{hw} = \beta_t \frac{I_t^{sp} + I_t^{hw}}{N^{sp} + N^{hw}} + \tilde{\beta}_t \frac{H_t^{sp} + H_t^{hw} + H_t^{hp}}{N^{hp}}$  and  $\lambda_t^{hp} = \tilde{\beta}_t \frac{I_t^{hw} + H_t^{sp} + H_t^{hw} + H_t^{hp}}{N^{hw} + N^{hp}}$ , where  $I_t^{sp}, I_t^{hw}, H_t^{sp}, H_t^{hw}$  and  $H_t^{hp}$  denote the numbers of individuals in compartments  $I^{sp}, I^{hw}, H^{sp}, H^{hw}$  and  $H^{hp}$ , respectively;  $\beta_t$  and  $\tilde{\beta}_t$  are the daily effective contact rates in the community and hospitals, respectively;  $\zeta^X$  and  $\zeta^Y$  are temporary level shift interventions [4] reflecting the increment of infectiousness during the Hospital X and Housing Estate Y SSEs, i.e. from days  $\tau_0^X$  and  $\tau_0^Y$  to days  $\tau_1^X$  and  $\tau_1^Y$ .

This leads to:

$$P(\mathbf{Z},\mathbf{\Omega}|\boldsymbol{\theta}) = \prod_{i/O_i < +\infty} \mathbf{1}_{\{v_i = \omega_i + 5\}} \times \prod_{\substack{i/O_i < +\infty \\ \delta_i = +\infty}} f_{m,q^2}(\psi_i - v_i) \\ \times \prod_{\substack{i/O_i < +\infty \\ \delta_i < +\infty}} (1 - F_{m,q^2}(\psi_i - v_i)) \times \prod_{t=1}^{+\infty} \prod_{C=gp,hw,hp} Bin_{S_i^C, p_i^C}(J_t^C)$$

where  $Bin_{n,p}(k) = \binom{n}{k} p^k (1-p)^{n-k}$ ;  $p_t^C = 1 - e^{-\lambda_t^C}$  ( $C = gp, hw, hp$ ),

and  $J_t^C = \sum_{\substack{i/O_i < +\infty \\ \kappa_i = C}} \mathbf{1}_{\{\omega_i = t\}}$  ( $C = gp, hw, hp$ ) is the incidence in category- $C$  on day  $t$ .

The vector  $\boldsymbol{\theta} = \left\{ m, q, (\beta_t)_{t=1, \dots, T}, (\tilde{\beta}_t)_{t=1, \dots, T}, \zeta^X, \tau_0^X, \tau_1^X, \zeta^Y, \tau_0^Y, \tau_1^Y \right\}$  comprised about 228 unknown parameters, the epidemic lasting about  $T = 110$  days.

For all model parameters except the effective contact rates, independent prior distributions were chosen. For the time of start of SSEs, the prior distributions were informative (see Table 1). The effective contact rates  $\beta_t$  and  $\tilde{\beta}_t$  were modeled as second-order Gaussian random walks, on the log scale, with flat exponential priors on the first two states of the random walk. In this approach, the respective variances  $\sigma^2$  and  $\tilde{\sigma}^2$  of innovations correspond to the smoothing parameters of cubic smoothing splines [21]; smaller values of  $\sigma^2$  and  $\tilde{\sigma}^2$  are associated with smoother trajectories. For the two precision parameters  $1/\sigma^2$  and  $1/\tilde{\sigma}^2$ , exponential hyperpriors with mean  $\eta = 300$  were selected. A sensitivity analysis of the hyperparameter value was performed (see Text S1).

### Parameter Estimation

A Markov chain Monte Carlo (MCMC) method was used to sample the joint posterior distribution  $\zeta(\mathbf{Y}, \mathbf{Z}, \mathbf{\Omega}, \boldsymbol{\theta})$  [22,23]. More details on the sampler are provided in Text S2.

From the joint posterior distribution of the parameters, a number of meaningful epidemiological quantities, such as daily case-reproduction numbers [24] in each category (see Text S3), could be derived. In particular, the number of cases generated by each SSE could be estimated.

### Results

Estimates of the days of SSE starts and ends, increments ( $\zeta^X, \zeta^Y$ ), and the number of SSE cases in Hospital X and Housing Estate Y are shown in Table 2. Despite the somewhat shorter SSE

**Table 1.** Prior Distributions for Model Parameters.

| Parameters                                                   | Description                                                        | Prior Distributions                           |
|--------------------------------------------------------------|--------------------------------------------------------------------|-----------------------------------------------|
| $\frac{1}{\sigma^2}, \frac{1}{\tilde{\sigma}^2}$             | Inverse variance of innovations of random walks                    | Exponential distribution (mean $\eta = 300$ ) |
| $m, q$                                                       | Mean and standard deviation of the infectious period               | Gamma distribution (mean 200, variance 40000) |
| $\beta_1, \beta_2$                                           | Effective contact rates in the community during the first two days | Exponential distribution (mean 1000)          |
| $\tilde{\beta}_1, \tilde{\beta}_2$                           | Effective contact rates in hospitals during the first two days     | Exponential distribution (mean 1000)          |
| $\zeta^X(\tau_1^X - \tau_0^X), \zeta^Y(\tau_1^Y - \tau_0^Y)$ | Area under SSE curves                                              | Exponential distribution (mean 1000)          |
| $\tau_0^X$                                                   | Day Hospital X SSE starts                                          | Uniform distribution on 02/18–03/10           |
| $\tau_0^Y$                                                   | Day Housing Estate Y SSE starts                                    | Uniform distribution on 03/14–03/24           |
| $\tau_1^X - \tau_0^X, \tau_1^Y - \tau_0^Y$                   | SSE durations                                                      | Poisson distribution (mean 3)                 |

doi:10.1371/journal.pcbi.1000471.t001

**Table 2.** Estimated Parameters for Super Spreading Events in Hospital X and Housing Estate Y.

| Site             | Parameter  | Unit               | Mean                 | 95% Credible Intervals                      |
|------------------|------------|--------------------|----------------------|---------------------------------------------|
| Hospital X       | $\tau_0^X$ |                    | March 1, 2003        | February 28–March 2, 2003                   |
|                  | $\tau_1^X$ |                    | March 11, 2003       | March 10–March 13, 2003                     |
|                  | $\xi^X$    | Days <sup>-1</sup> | $1.4 \times 10^{-4}$ | $(1.1 \times 10^{-4} - 1.8 \times 10^{-4})$ |
|                  | Size       | Cases              | 94                   | (72–118)                                    |
| Housing Estate Y | $\tau_0^Y$ |                    | March 18, 2003       | March 17–March 18, 2003                     |
|                  | $\tau_1^Y$ |                    | March 23, 2003       | March 23–March 24, 2003                     |
|                  | $\xi^Y$    | Days <sup>-1</sup> | $5.2 \times 10^{-6}$ | $(4.1 \times 10^{-6} - 6.4 \times 10^{-6})$ |
|                  | Size       | Cases              | 235                  | (185–288)                                   |

doi:10.1371/journal.pcbi.1000471.t002

duration for Housing Estate Y than for Hospital X, 2.5 times more cases occurred in Housing Estate Y than Hospital X.

The estimated mean of the infectious period was 9.3 days (95% credible interval: (8.6–9.9)), with an estimated standard deviation of 2.3 days (95% credible interval: (1.8–2.9)). The proportion of the infectious period spent in the community decreased continuously with time (>60% at the beginning, <20% as early as early April). Toward the end of the epidemic, >95% of the infectious period was spent inside hospitals (see Figure 3).

The daily effective contact rates in the community ( $\beta_t$ ) and hospitals ( $\beta_t^h$ ) exhibited progressive a decrease in time, as shown in Figure 4. However, while the contact rate was almost 0 by late March inside hospitals, it remained >0.17 in the community.

The case-reproduction number first increased to 5.1 in the general population in late February and to 3.0 for healthcare workers in early March (see Text S3). It then decreased until the end of the epidemic. The case-reproduction numbers were <1 on March 13 for healthcare workers and on March 20 for the general population. Among nosocomial cases, the case-reproduction number was always <1, with a maximum value of 0.2 on March 14.

The model's ability to reproduce the main features of the epidemic was checked by simulating 5000 epidemics with

parameters sampled from the estimated joint posterior distribution, as described in Text S4. The size and duration of simulated epidemics, as well as cases breakdown in categories (*gp*, *hw*, *hp*) mirrored the Hong Kong epidemic (see Figure 2).

We also simulated 100 epidemics with a single set of parameters, sampled from the posterior distribution. Then, the estimation procedure was applied to each simulated epidemic in order to reestimate the parameters. The original parameters were in the estimated corresponding 95% credible interval in 87% of cases.

## Discussion

To rapidly and economically design and assess control measures for epidemics in modern societies, added insight into the dynamics of disease transmission is needed. These dynamics are conveniently summarized by critical, albeit non-observable, characteristics, such as the duration of the infectious period and effective contact rates. Estimation of these parameters from the observed data requires the development of mathematical models. Herein, we presented a model for epidemics that provides for social heterogeneity and time variability of transmission parameters. As a working example, the model was applied to the 2003 SARS epidemic in Hong Kong.

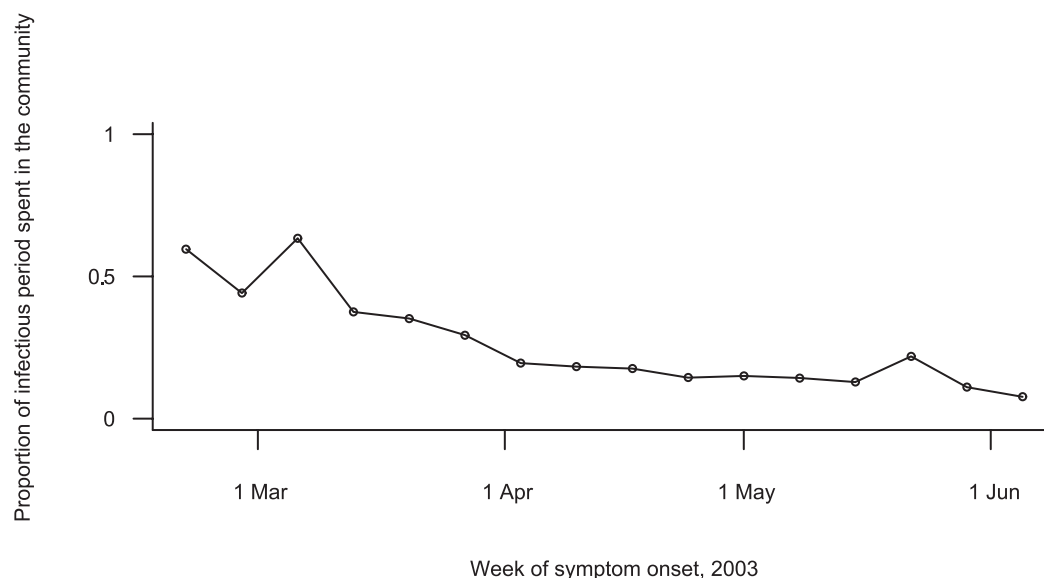

**Figure 3. Proportion of Infectious Period Spent in the Community before Hospitalization as a Function of Week of Symptom Onset.** doi:10.1371/journal.pcbi.1000471.g003

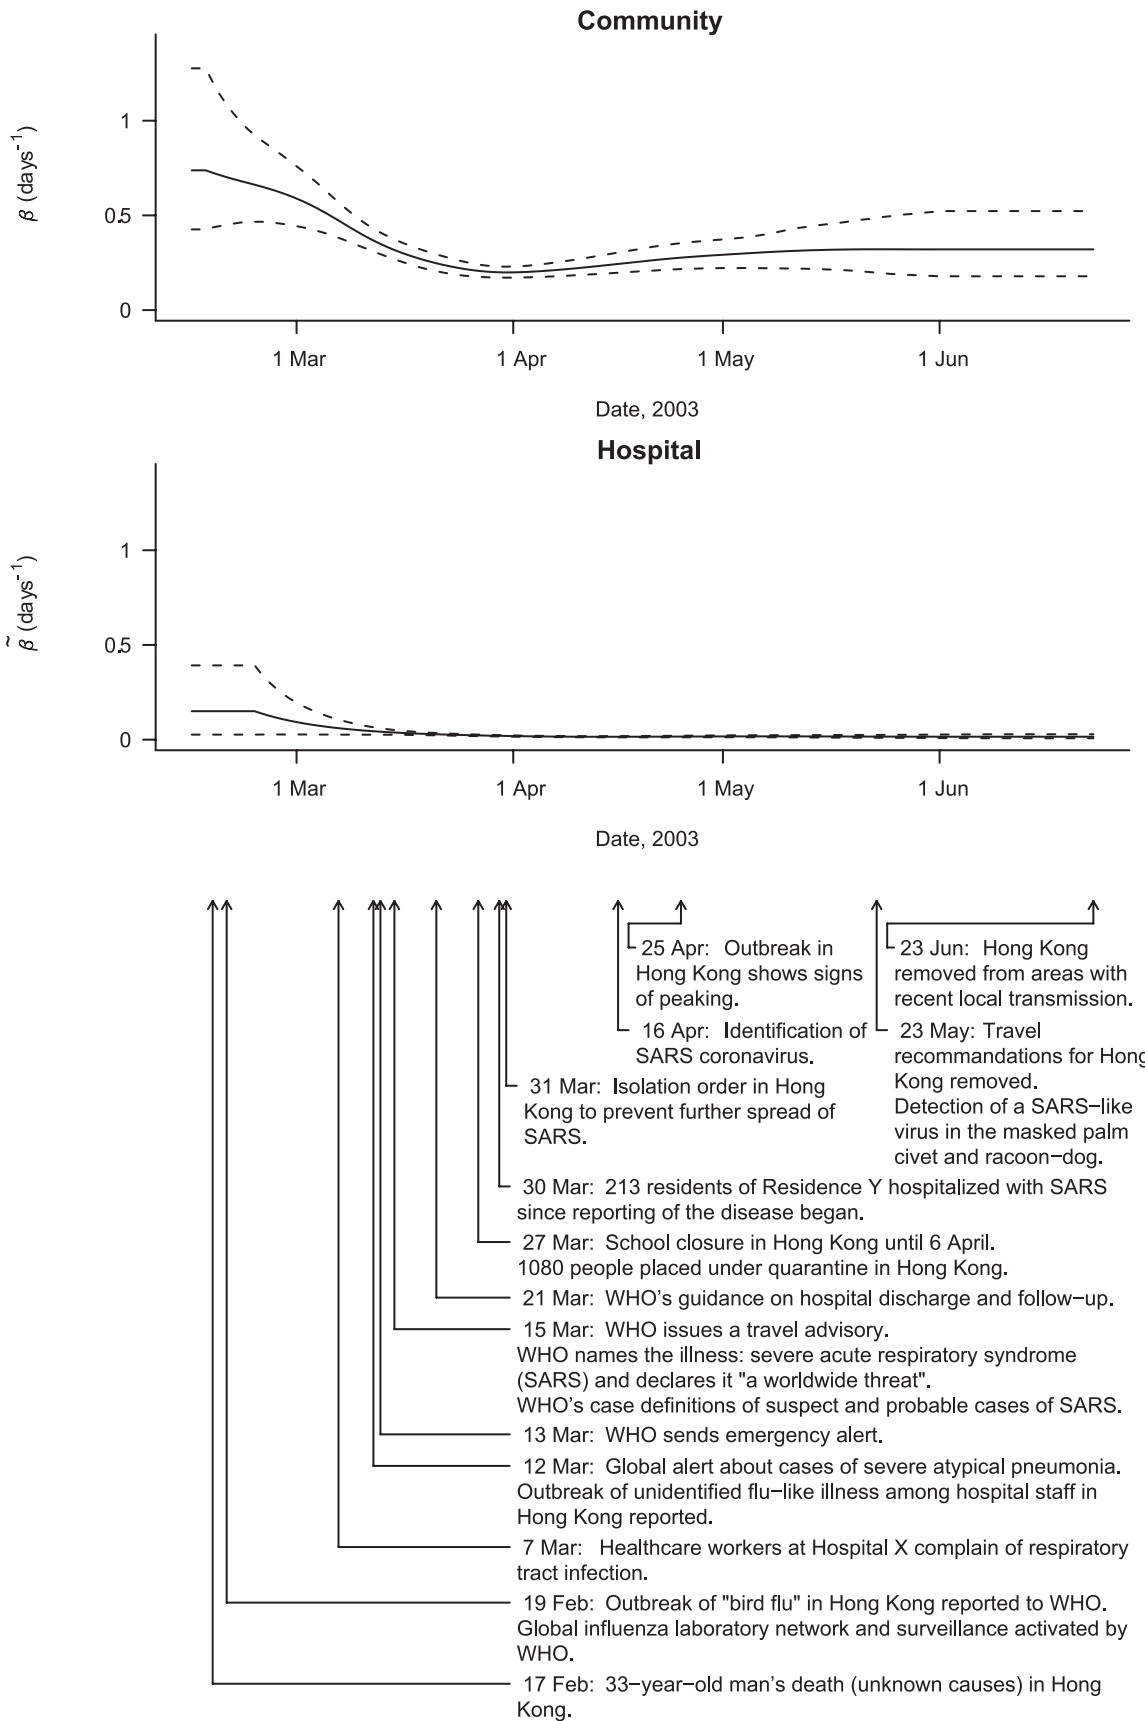

**Figure 4. Mean Effective SARS Contact Rates (solid line) and 95% Credible Intervals (dashed line) in the Community and Hospitals as a Function of Time and Dates of Important Events.**  
doi:10.1371/journal.pcbi.1000471.g004

The effect of interventions and/or changes in behavior during the 2003 SARS outbreak may be modelled as time varying contact rates [12,15,25] or involve shortening of the infectious period [19]. Here, we adopted the first view. To assess if the data supported this choice, a model was fit where, in addition to time varying contact rates, we allowed the mean infectious period to change over three consecutive periods. The three posterior means were 9.5 days (before March 20), 9.2 (March 21 to April 9) and 10 days (after April 10), indicating that the time varying contact rates alone model the data adequately.

While the duration of the infectious period is an obvious determinant of disease transmission, no estimate has been available for SARS. The distribution of the viral load was found to peak 8–10 days after symptom onset [13,18,26,27]. Here, assuming that the infectious period started between 1 day before and 4 days after symptom onset, it was estimated to extend over an average period of 9.3 days. We also found that the proportion of time infectious people spent outside hospitals decreased during the outbreak and was <5% at the very end, in agreement with Anderson et al. [18] and Leung et al. [13] who showed that the time from symptom onset to admission was shorter at the end of the epidemic.

One of the most striking features of the Hong Kong SARS epidemic was the occurrence of two SSEs. By definition, SSEs correspond to exceptional circumstances that are usually limited to well-circumscribed areas, such as Hospital X and Housing Estate Y, and last for only a few days [10]. In this respect, the very high contact rates generated by the SSEs were modeled as ‘innovation outliers’ [28], to avoid spurious overestimation of contact rates among the Hong Kong population.

Whether SSEs are a result of a few particularly highly infectious cases (excreting much virus and/or highly connected socially), or of particular environmental circumstances, or maybe both, remains unclear [16,29,30]. In our model, the force of infection associated with each SSE was independent on the number of currently infectious cases. The duration of SSEs was estimated independently for each SSE, and was independent on the duration of the infectious period. Therefore, our model was consistent with all possible causes of SSEs: one or several super-spreaders, or particular environmental circumstances, etc.

The level shift interventions [20] that were superimposed on the process describing the time evolution of the infection rates differed significantly from zero. Taking into account only serologically confirmed cases, we estimated that the Hospital X SSE began on March 1<sup>st</sup>, lasted 11 days and was responsible for 94 cases; and that the Housing Estate Y SSE began on March 18, lasted 6 days and caused 235 cases. Previous studies investigating SSEs in Hong Kong used all cases. By contact tracing, Lee et al. [11] found that the Hospital X SSE started on March 4 and involved 125 cases; the Housing Estate Y SSE had been estimated to start on March 19 [13] and to involve 312–330 [13] or 331 [12] cases.

Effective contact rates were estimated on a daily basis, in the community and hospitals. Both rates tended to decline, probably reflecting the effect of control measures (listed in Figure 4 [31,32]) or self-adopted behavioral changes. The measures seem to have been particularly effective in hospitals, where the effective contact rate was 0 by late March, whereas the risk in the community did not decrease as sharply. In both settings, the effective contact rate was almost constant after late March, when no more control measures were introduced.

Others who studied the dependence of disease transmission on time reported reproduction numbers rather than effective contact rates [12,14]. While the daily effective contact rates are sensitive to short-term day-to-day variations in transmission, the reproduction

numbers reflect the integrated influences of the temporal evolution of effective contact rates, the infectious period duration and other factors, such as time spent in the community before hospitalization. Here, estimates of daily reproduction numbers were obtained for each social category. Notably, unlike Cauchemez et al. [14], it was not necessary to assume prior knowledge or constancy of the generation interval. The reproduction numbers showed a trend similar to the effective contact rates, with a clearly decreasing trend over time, suggesting that the epidemic was under control as early as mid-March (see Figure in Text S3). Moreover, the temporal patterns for the general population and healthcare workers were similar, with the reproduction numbers being higher for the general population, thereby indicating that on average, an infectious healthcare worker did not infect more people than any other infectious person. The reproduction numbers for nosocomial cases were much lower, either because they had fewer contacts or because the people they were in contact with were protected (typically healthcare workers wearing masks).

Our estimation procedure, applied to a set of 100 simulated epidemics, showed that in 87% of cases, the parameters used for simulation were inside the corresponding posterior 95% credible intervals. While most parameters were well estimated, the procedure tended to overestimate the duration of each SSE, while simultaneously underestimating its strength. The number of people affected by each SSE (i.e. population × duration × strength) was therefore correct, but its extent in time less robust. Ignoring the 17 days corresponding to both SSEs, 98% of the remaining parameters used for simulation were inside the posterior corresponding 95% credible intervals, indicating very little bias in our estimation procedure.

Herein, we described an approach to estimate the role of time variability and social heterogeneity in epidemic dynamics. Our model’s simplifying assumptions such as the fixed duration of the latency period or the constant probability of transmission throughout the infectious period of cases, can be relaxed at the price of increasing complexity. Similarly, a more detailed model taking into account household transmission, and transmission inside and between hospitals, rather than assuming homogeneous mixing in the community and in hospitals, could be implemented, at the cost of a dramatic increase in the number of model parameters. More generally, the model can be easily accommodated to fit the specificities of any transmissible disease.

## Supporting Information

### Text S1 Choice of Hyperparameter $\eta$

Found at: doi:10.1371/journal.pcbi.1000471.s001 (0.09 MB PDF)

### Text S2 Sampler Used for Parameter Estimation

Found at: doi:10.1371/journal.pcbi.1000471.s002 (0.07 MB PDF)

### Text S3 Estimation of the Case-Reproduction Number $R^{A \rightarrow B}_t$

Found at: doi:10.1371/journal.pcbi.1000471.s003 (0.39 MB PDF)

### Text S4 Epidemic Simulation

Found at: doi:10.1371/journal.pcbi.1000471.s004 (0.04 MB PDF)

## Acknowledgments

The authors thank the Hong Kong Department of Health and Hong Kong Hospital Authority which were involved with the public health control of the SARS epidemic, and data collection and processing.

## Author Contributions

Conceived and designed the experiments: AC P-YB GT A-JV. Performed the experiments: AC P-YB. Analyzed the data: AC P-YB GT. Contributed reagents/materials/analysis tools: P-YB GML. Wrote the paper: AC. Contributed to drafting the manuscript: P-YB GT GML A-JF.

## References

1. Morse SS (1995) Factors in the emergence of infectious diseases. *Emerg Infect Dis* 1: 7–15.
2. Chan-Yeung M (2004) Severe acute respiratory syndrome (SARS) and healthcare workers. *Int J Occup Environ Health* 10: 421–427.
3. Lau JT, Fung KS, Wong TW, Kim JH, Wong E, et al. (2004) SARS transmission among hospital workers in Hong Kong. *Emerg Infect Dis* 10: 280–286.
4. Nishiura H, Kuratsuji T, Quy T, Phi NC, Van Ban V, et al. (2005) Rapid awareness and transmission of severe acute respiratory syndrome in Hanoi French Hospital, Vietnam. *Am J Trop Med Hyg* 73: 17–25.
5. Varia M, Wilson S, Sarwal S, McGeer A, Gournis E, et al. (2003) Investigation of a nosocomial outbreak of severe acute respiratory syndrome (SARS) in Toronto, Canada. *CMAJ* 169: 285–292.
6. Anderson RM, May RM (1991) *Infectious diseases of humans: Dynamics and control*. Oxford: Oxford University Press.
7. Chowell G, Fenimore PW, Castillo-Garsow MA, Castillo-Chavez C (2003) SARS outbreaks in Ontario, Hong Kong and Singapore: the role of diagnosis and isolation as a control mechanism. *J Theor Biol* 224: 1–8.
8. World Health Organization (2003) Severe acute respiratory syndrome (SARS): Status of the outbreak and lessons for the immediate future. Available: [http://www.who.int/csr/media/sars\\_wha.pdf](http://www.who.int/csr/media/sars_wha.pdf). Accessed 26 June 2008.
9. World Health Organization (2003) Consensus document on the epidemiology of severe acute respiratory syndrome (SARS). Available: <http://www.who.int/csr/sars/en/WHOconsensus.pdf>. Accessed 26 June 2008.
10. Lloyd-Smith JO, Schreiber SJ, Kopp PE, Getz WM (2005) Superspreading and the effect of individual variation on disease emergence. *Nature* 438: 355–359.
11. Lee N, Hui D, Wu A, Chan P, Cameron P, et al. (2003) A major outbreak of severe acute respiratory syndrome in Hong Kong. *N Engl J Med* 348: 1986–1994.
12. Riley S, Fraser C, Donnelly CA, Ghani AC, Abu-Raddad LJ, et al. (2003) Transmission dynamics of the etiological agent of SARS in Hong Kong: impact of public health interventions. *Science* 300: 1961–1966.
13. Leung GM, Hedley AJ, Ho LM, Chau P, Wong IO, et al. (2004) The epidemiology of severe acute respiratory syndrome in the 2003 Hong Kong epidemic: an analysis of all 1755 patients. *Ann Intern Med* 141: 662–673.
14. Cauchemez S, Boëlle PY, Donnelly CA, Ferguson NM, Thomas G, et al. (2006) Real-time estimates in early detection of SARS. *Emerg Infect Dis* 12: 110–113.
15. Lloyd-Smith JO, Galvani AP, Getz WM (2003) Curtailing transmission of severe acute respiratory syndrome within a community and its hospital. *Proc Biol Sci* 270: 1979–1989.
16. Kwok KO, Leung GM, Lam WY, Riley S (2007) Using models to identify routes of nosocomial infection: a large hospital outbreak of SARS in Hong Kong. *Proc Biol Sci* 274: 611–617.
17. Auranen K, Arjas E, Leino T, Takala AK (2000) Transmission of pneumococcal carriage in families: a latent Markov process for binary longitudinal data. *Journal of the American Statistical Association* 95: 1044–1053.
18. Anderson RM, Fraser C, Ghani AC, Donnelly CA, Riley S, et al. (2004) Epidemiology, transmission dynamics and control of SARS: the 2002–2003 epidemic. *Philos Trans R Soc Lond B Biol Sci* 359: 1091–1105.
19. Lipsitch M, Cohen T, Cooper B, Robins JM, Ma S, et al. (2003) Transmission dynamics and control of severe acute respiratory syndrome. *Science* 300: 1966–1970.
20. Box GEP, Tiao GC (1975) Intervention analysis with applications to economic and environmental problems. *Journal of the American Statistical Association* 70: 70–79.
21. Knorr-Held L (1999) Conditional prior proposals in dynamic models. *Scandinavian Journal of Statistics* 26: 129–144.
22. Gilks W, Richardson S, Spiegelhalter D (1996) *Markov chain Monte Carlo in practice*. London: Chapman & Hall.
23. Robert C (2001) *The Bayesian choice: From decision-theoretic foundations to computational implementation*. New York: Springer.
24. Fraser C (2007) Estimating individual and household reproduction numbers in an emerging epidemic. *PLoS ONE* 2: e758.
25. Gumel AB, Ruan S, Day T, Watmough J, Brauer F, et al. (2004) Modelling strategies for controlling SARS outbreaks. *Proc Biol Sci* 271: 2223–2232.
26. Peiris JS, Chu CM, Cheng VC, Chan KS, Hung IF, et al. (2003) Clinical progression and viral load in a community outbreak of coronavirus-associated SARS pneumonia: a prospective study. *Lancet* 361: 1767–1772.
27. Pitzer VE, Leung GM, Lipsitch M (2007) Estimating variability in the transmission of severe acute respiratory syndrome to household contacts in Hong Kong, China. *Am J Epidemiol* 166: 355–363.
28. Fox AJ (1972) Outliers in time series. *Journal of the Royal Statistical Society Series B-Statistical Methodology* 34: 350–363.
29. Li Y, Yu IT, Xu P, Lee JH, Wong TW, et al. (2004) Predicting super spreading events during the 2003 severe acute respiratory syndrome epidemics in Hong Kong and Singapore. *Am J Epidemiol* 160: 719–728.
30. Wong TW, Lee CK, Tam W, Lau JT, Yu TS, et al. (2004) Cluster of SARS among medical students exposed to single patient, Hong Kong. *Emerg Infect Dis* 10: 269–276.
31. World Health Organization (2003) SARS: Chronology of a serial killer. Available: [http://www.who.int/csr/don/2003\\_07\\_04/en/print.html](http://www.who.int/csr/don/2003_07_04/en/print.html). Accessed 18 November 2008.
32. WSARS Expert Committee of HKSAR Government (2003) Chronology of the SARS epidemic in Hong Kong. Available: [http://www.sarsexpertcom.gov.hk/english/reports/reports/files/c\\_app3.pdf](http://www.sarsexpertcom.gov.hk/english/reports/reports/files/c_app3.pdf). Accessed 18 November 2008.
