# Supplementary material for: Temporal Variability and Social Heterogeneity in Disease Transmission: The Case of SARS in Hong Kong
Source: PubMed Central journal article supplement (PMC2717369; doi:10.1371/journal.pcbi.1000471), 2009-08-21
Supplement: pcbi.1000471.s003.pdf [file pcbi.1000471.s003.pdf]

### Text S3. Estimation of the Case-Reproduction Number $R_t^{A \rightarrow B}$

In this Appendix, we derive an estimator for the case-reproduction number,  $R_t^{A \rightarrow B}$ , the mean number of secondary cases that a category- $A$  infectious individual ( $A = gp, hw, \text{ or } hp$ ), who was infected on day  $t$ , will eventually generate among category- $B$  susceptible individuals ( $B = gp, hw, \text{ or } hp$ ). In the following,  $\mathbf{1}_E(x)$  is the indicator function taking value 1 when  $x \in E$  and 0 otherwise.

There are five sources of infection ( $g = 1, \dots, 5$ ), and three target susceptible compartments ( $B = gp, hw, hp$ ). The matrix  $\left(\lambda_t^{g \rightarrow B}\right)_{g=1, \dots, 5; B=gp, hw, hp}$  of infection rates is defined in Table S3.1.

**Table S3.1.** Definition of Infection Rates

| Source of infection              | Target Susceptible Compartments              |                                                           |                                                                    |
|----------------------------------|----------------------------------------------|-----------------------------------------------------------|--------------------------------------------------------------------|
|                                  | $S^{gp}$                                     | $S^{hw}$                                                  | $S^{hp}$                                                           |
| $I^{gp}$                         | $\beta_t \frac{I^{gp}}{N^{gp} + N^{hw}}$     | $\beta_t \frac{I^{gp}}{N^{gp} + N^{hw}}$                  | 0                                                                  |
| $I^{hw}$                         | $\beta_t \frac{I^{hw}}{N^{gp} + N^{hw}}$     | $\beta_t \frac{I^{hw}}{N^{gp} + N^{hw}}$                  | $\tilde{\beta}_t \frac{I^{hw}}{N^{hw} + N^{hp}}$                   |
| $H^{gp} \cup H^{hw} \cup H^{hp}$ | 0                                            | $\tilde{\beta}_t \frac{H^{gp} + H^{hw} + H^{hp}}{N^{hp}}$ | $\tilde{\beta}_t \frac{H^{gp} + H^{hw} + H^{hp}}{N^{hw} + N^{hp}}$ |
| Housing Estate Y SSE             | $\xi^Y \mathbf{1}_{[\tau_0^Y, \tau_1^Y]}(t)$ | 0                                                         | 0                                                                  |
| Hospital X SSE                   | 0                                            | $\xi^X \mathbf{1}_{[\tau_0^X, \tau_1^X]}(t)$              | 0                                                                  |

Let  $m_u^B$  be the total number of incident cases in compartment  $S^B$  on day  $u$ , attributed to the five sources of infection. Conditionally on  $m_u^B$ , the respective contributions of the five sources of infection have the multinomial distribution with parameters  $m_u^B$ , and  $(\pi_u^{1 \rightarrow B}, \pi_u^{2 \rightarrow B}, \pi_u^{3 \rightarrow B}, \pi_u^{4 \rightarrow B}, \pi_u^{5 \rightarrow B})$ , where  $\pi_u^{g \rightarrow B} = \frac{\lambda_u^{g \rightarrow B}}{\lambda_u^B}$  for  $g = 1, \dots, 5$ . On average, the total number of secondary cases contaminated by patients from the source of infection  $g$  on day  $u$  in compartment  $S^B$  is  $m_u^B \pi_u^{g \rightarrow B}$ . Now, as the model is homogeneously mixed, a typical case  $i$  from source  $g$  on day  $u$  is responsible for  $\frac{m_u^B \pi_u^{g \rightarrow B}}{n_u^g}$  secondary cases on average, where  $n_u^g$  is the number of cases that are also in source  $g$  on day  $u$ .

Throughout his/her infectious period, given case  $i$  thus generates an average of  $\sum_{u=\nu_i}^{\psi_i} \frac{m_u^B \pi_u^{g_i(u) \rightarrow B}}{n_u^{g_i(u)}}$

secondary cases in compartment  $S^B$ , where  $g_i(u)$  is the source of infection to which  $i$  belongs on day  $u$ . Averaging over all category- $A$  cases who were infected on day  $t$ , our estimator of  $R_t^{A \rightarrow B}$  is

$$\frac{1}{m_t^A} \sum_{i \in A} \mathbf{1}_{\{\omega_i=t\}} \sum_{u=\nu_i}^{\psi_i} \frac{m_u^B \pi_u^{g_i(u) \rightarrow B}}{n_u^{g_i(u)}}.$$

After the burn-in period, every 100 iterations of the MCMC algorithm, model parameters and augmented data were recorded, and the estimator of  $R_t^{A \rightarrow B}$  was calculated from these values as explained above. This finally gave the posterior distribution of the reproduction number  $R_t^{A \rightarrow B}$ , whose mean is represented in Figure S3.1.

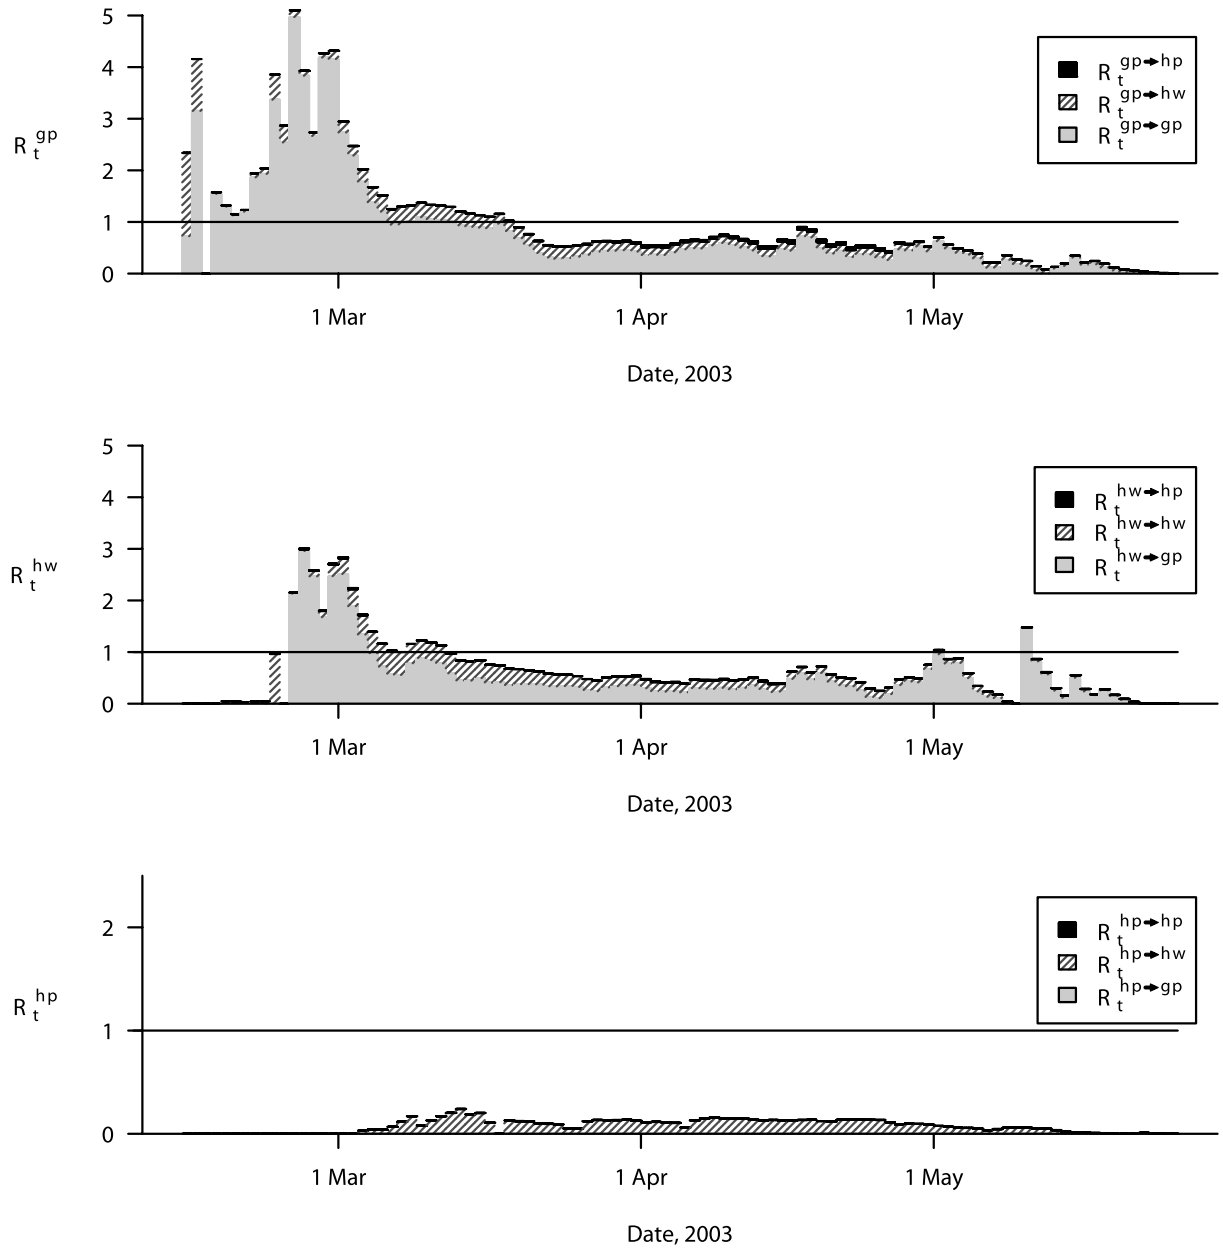

**Figure S3.1.** Mean Case-Reproduction Numbers in the General Population ( $R_t^{gp}$ ), among Healthcare Workers ( $R_t^{hw}$ ) and among Nosocomial Cases ( $R_t^{hp}$ ) as a Function of Time  
 $R_t^{A \rightarrow B}$  is the average number of category- $B$  secondary cases that a category- $A$  patient, infected at time  $t$ , will go on to infect, in turn.
