# Supplementary material for: Temporal Variability and Social Heterogeneity in Disease Transmission: The Case of SARS in Hong Kong
Source: PLoS Comput Biol. 2009 Aug 21;5(8):e1000471. doi: 10.1371/journal.pcbi.1000471 (PMC2717369; doi:10.1371/journal.pcbi.1000471)
Supplement: Text S4 — Epidemic Simulation (0.04 MB PDF) [file pcbi.1000471.s004.pdf]

## Text S4. Epidemic Simulation

We describe here the procedure used to simulate an epidemic with parameters  $\beta_t, \tilde{\beta}_t, m, q, \xi^Y, \tau_0^Y, \tau_1^Y, \xi^X, \tau_0^X, \tau_1^X$  in a population of size  $N$  including  $N^{hw}$  healthcare workers,  $N^{hp}$  hospitalized patients and  $N^{gp}$  people in the general population, so that  $N = N^{gp} + N^{hw} + N^{hp}$ . The first infected patient was assumed to belong to the general population. We assumed that his/her symptoms appear on  $O_1 =$  February 15, 2003, and he/she is admitted to hospital on  $A_1 =$  February 22, 2003. Furthermore, we assumed that he/she dies from SARS ( $d_1 = 1$ ). The time  $\nu_1$  when the patient becomes infectious was sampled from a uniform distribution on  $\{O_1 - 1, \dots, O_1 + 4\}$ . His/her time of contamination was then chosen as  $\omega_1 = \nu_1 - 5$ . The duration of infectious period for the first case was drawn from a uniform distribution in  $\{0, \dots, X\}$ , where  $X$  was sampled from the gamma distribution with mean and standard deviation  $(m, q)$ . The patient's duration of hospital stay was drawn from a gamma distribution with mean and standard deviation as in the dataset.

If  $k_t$  new infections have occurred before or on day  $t$ , we denote by  $\{\omega_1, \dots, \omega_{k_t}\}$  the times of contaminations  $\{\nu_1, \dots, \nu_{k_t}\}$ , the times infectious periods started,  $\{O_1, \dots, O_{k_t}\}$  the times of symptom onset,  $\{A_1, \dots, A_{k_t}\}$  the times of hospital admissions,  $\{\psi_1, \dots, \psi_{k_t}\}$  the times infectious periods ended,  $\{d_1, \dots, d_{k_t}\}$  the discharge status ( $d_i = 1$  if the patient would die and 0 otherwise),  $\{C_1, \dots, C_{k_t}\}$  each patient's category ( $C_i = hw, hp, gp$ ) and  $\{D_1, \dots, D_{k_t}\}$  the discharge dates.

$S_t^{hw} = N^{hw} - \sum_{i=1}^{k_t} \mathbf{1}_{\{C_i = hw\}}$  is the number of susceptible healthcare workers at time  $t$ ;

$S_t^{hp} = N^{hp} - \sum_{i=1}^{k_t} \mathbf{1}_{\{C_i = hp\}}$  is the number of susceptible hospitalized patients at time  $t$ ; and

$S_t^{gp} = N^{gp} - \sum_{i=1}^{k_t} \mathbf{1}_{\{C_i = gp\}}$  the number of susceptible individuals in the general population at time  $t$ .

$I_t^C = \sum_{i=1}^{k_t} \mathbf{1}_{\{C_i = C\}} \mathbf{1}_{\{\nu_i \leq t < \min(A_i, \psi_i)\}}$  was the number of infectious category- $C$  ( $C = gp, hw, hp$ ) individuals not hospitalized at time  $t$ .

$H_t^C = \sum_{i=1}^{k_t} \mathbf{1}_{\{C_i = C\}} \mathbf{1}_{\{\max(\nu_i, A_i) \leq t < \psi_i\}}$  was the number of infectious category- $C$  individuals hospitalized at time  $t$ .

The number  $n_{t+1}^C$  of new category- $C$  individuals infected on day  $t + 1$  was drawn from a binomial distribution with parameters  $S_t^C$  and  $p_t^C$  where [1]:

$$p_t^{gp} = 1 - \exp(-\lambda_t^{gp})$$

$$p_t^{hw} = 1 - \exp(-\lambda_t^{hw})$$

$$p_t^{hp} = 1 - \exp(-\lambda_t^{hp})$$

where the  $\lambda_t^C$  were defined in the Material and Methods part.

For each case  $i$  infected on day  $t + 1$ ,  $\omega_i = t + 1$  and  $\nu_i = \omega_i + 5$ .

The probability  $\pi_{gp}$  that a case would die was estimated as the observed mortality rate among patients in the general population :  $\pi_{gp} = 0.1308$ . Similarly, the probability of dying was given by  $\pi_{hp} = 0.3977$  for nosocomial SARS cases and by  $\pi_{hw} = 0.0228$  for a healthcare worker. For all  $i = 1, \dots, n_t^C$ , category  $C$  patient  $i$  had a probability  $\pi_C$  of dying. If the patient would not die ( $d_i = 0$ ), the duration of the infectious period was drawn from the gamma distribution with mean and standard deviation  $(m, q)$ . If the patient would die ( $d_i = 1$ ), a number  $X$  was drawn from the gamma distribution with mean and standard deviation  $(m, q)$ ; then, the duration of the infectious period was drawn from a uniform distribution on  $\{0, \dots, X\}$  to take into account the potential reduction of infectious period caused by death. The time of the first symptoms was drawn from a uniform distribution in  $\{\nu_i - 4, \dots, \nu_i + 1\}$ . For all non nosocomial cases, the time from symptom onset to hospital admission was drawn from a gamma distribution, with parameters depending on the time of symptom onset, taken from Donnelly et al. [2]. For nosocomial cases, the admission time was arbitrarily

chosen as November 5, 2002. The time of discharge from hospital was  $Y$  days after symptoms onset, where  $Y$  was sampled from the dataset.

## References

1. Lekone PE, Finkenstadt BF (2006) Statistical inference in a stochastic epidemic SEIR model with control intervention: Ebola as a case study. *Biometrics* 62: 1170–1177.
2. Donnelly CA, Ghani AC, Leung GM, Hedley AJ, Fraser C, et al. (2003) Epidemiological determinants of spread of causal agent of severe acute respiratory syndrome in Hong Kong. *Lancet* 361: 1761–1766.
